## Current Bibliography.

Prepared by the Editor with the assistance of Miss THURSBY-PELHAM.

**N**OTE. The scope of the Bibliography is limited in the main to the area covered by the Council's activities, but there are included papers of general interest relating to other areas in the North Temperate and Arctic regions and exceptionally elsewhere. Limnological references are not as a rule given, but papers relating to brackish waters and to salmon and freshwater fish studied by the Council are included.

The classification of entries follows in a general way that adopted in Dr. ALLEN'S Selected Bibliography published in Vol. I, Nos. 1 and 2 of the Journal, and since reprinted (Price, 1 Kr.).

Subscribers and those on the distribution list will receive regularly upon application to the Administrative Secretary copies of the Bibliography printed on one side of the page only, for use in making up card indices.

The Editor will be glad to be advised of emendations and additions to the Bibliography.

## Physical and Biological Conditions in the Sea.

### GENERAL HYDROGRAPHY

- ANON. Ind. Comité voor Wetenschapp. Onderzoekingen. 1.—3. Bulletin van de Willebrord Snellius Expeditie.
- ANON. The Fishery Barograph. Meteorological Office, Air Ministry, London, 1931.
- ANON. Carte générale bathymétrique des Océans. 2e Ed. (1912—1930). Musée Océanographique, Monaco, 1931.
- ANON. Echolotungen der deutschen Kreuzer "Berlin" (1928) und "Emden" (1930), des Vermessungsschiffes "Meteor" (1930) und der Dampfer "Bremen" und "Europa" (1930). Nachr. f. Seefahrer, 1931, Nr. 12, Beiheft.
- BEAUGÉ, L. Contribution à l'étude des relations de la Météorologie et de l'Océanographie. Bull. de la Soc. d'Océanogr. de France, XI, 1057—63, 1931.
- BEAUGÉ, L. Remarques sur les conditions hydrologiques des Bancs de Terre-Neuve. Rev. des Trav. de l'Office des Pêches Marit. IV, 143—52, 1931.
- BERGET, A. Sur les sondages par le son. Annales de l'Inst. Océanogr. X, 1—18, 1931.
- BORN, A. Die Entstehung der Ozeane. Meereskunde, XVIII, Nr. 3, 1931.
- DEFANT, A. Ergebnisse der "Meteor"-Fahrten in die Isländischen-Grönländischen Gewässer 1929—30. Zschr. f. Ges. f. Erdk., Berlin 1931, Nr. 5—6.
- FLEMING, J. A. and PETERS, W. J. Resolutions passed at Leningrad with reference to the proposed Polar Year. Monthly Weather Review, LIX, 17—18, U.S.A. 1931.
- GAMS, H. Neue Beiträge zur Geschichte der Ostsee. Internat. Revue der gesamt. Hydrobiol. und Hydrogr. XXVI, 168—78, 1931.
- GREGORY, J. W. A Deep Trench on the Floor of the North Sea. Geogr. Journ. LXXVII, 548—51, 1931.
- LONG, A. T. The Antarctic Cruise of the Discovery, 1929—1930. Hydrographic Review, VIII, No. 1, 23—27, Monaco, 1931.
- LONG, A. T. The Norvegia Antarctic Expedition of 1929—1930. Hydrographic Review, VIII, No. 1, 28—32, Monaco, 1931.
- MARGERIE, E. DE. Les dernières feuilles de la Carte Générale Bathymétrique des Océans (Panneau du Pôle Nord). Bull. de l'Inst. Océanogr. No. 280, Monaco, 1931.
- POPOV, A. M. Hydrobiological Explorations in the Nordenskiöld Sea (Sea of the Brothers Laptev). Internat. Revue der gesamt. Hydrobiol. und Hydrogr. XXV, 462—67, 1931.
- PRATJE, O. Einführung in die Geologie der Nord- og und Ostsee (Entwicklung, Formen, Küsten, und Sedimente). Die Tierwelt der Nord- und Ostsee (Grimpe u. Wagler), Teil I. d., Leipzig, 1931.
- RUNDO, A. Sur l'Évaluation de l'apport des eaux fluviales à la Baltique. III-ème Conférence hydrologique des États Baltiques, Warszawa, Mai 1930.
- SUDA, K., MATSUDAIRA, Y., KAWASAKI, H., MIZUUTI, M. and TAKAHATA, V. T. The results of the Oceanographical Observations on board R.M.S. "Syunpu Maru" in the Setonaikai (The Inland Sea) in the years 1928, 1929 and 1930 (Part 2). Journ. of Oceanogr., II, 537—43, Imp. Mar. Observ., Kobe, Japan, 1931. (In Japanese, English Résumé.)
- SWEDEN. Svenska Hydrografisk-Biologiska Kommissionens Fyrskottsundersökning, År 1930. Göteborg, 1931.
- THORADE, H. Probleme der Wasserwellen. Probleme d. Kosm. Physik, Band XIII—XIV, Hamburg, 1931.

- VALLAUX, C. Ice Observation and Patrol in the waters of Newfoundland in 1929. *Hydrographic Review*, VIII, No. 1, 59—69, Monaco, 1931.

### Physics and Chemistry of Sea Water.

- KALLE, K. Meereskundliche chemische Untersuchungen mit Hilfe des Zeiss'schen Pulfrich-Photometers. I. Mitteilung: Apparatur. *Ann. der Hydrogr. und Marit. Meteor.* LIX, 313—17, 1931.
- SUND, O. Colorimetry at Sea, with a Description of a new Colorimeter. *Journal du Conseil*, VI, 241—45, 1931.
- THOMPSON, T. G., JOHNSTON, W. R. and WIRTH, H. E. The Sulfate-Chlorinity Ratio in Ocean Waters. *Journal du Conseil*, VI, 246—51, 1931.
- WATTENBERG, H. Der chemische Aufbau des Atlantischen Ozeans. *Finska Kemist-samfundets Meddelanden*, No. 2, Helsingfors, 1931.

### TEMPERATURE AND SALINITY

- BÖHNECKE, G. Beiträge zur Ozeanographie des Oberflächenwassers in der Dänemarkstrasse und Irmingersee. Teil 1. Zugleich Bericht über die Fahrt des "Meteor" im Sommer 1930. *Ann. der Hydrogr. und Marit. Meteor.* LIX, 317—25, 1931.
- BROOKS, C. F. Upwelling Cold Water on the Coast of New Jersey. *Monthly Weather Review*, LIX, 202, U.S.A. 1931.
- DE BUEN, R. Estudio de los metodos que pueden ser empleados en la determinacion de la densidad. *Mem. del Cons. Oceanogr. Ibero-Americano*. Nr. 3, Madrid.
- CLARKE, K. B. Significance of air and sea temperatures obtained on Cruise VII of the Carnegie. *Monthly Weather Review*, LIX, 183—85, U.S.A. 1931.
- HELLAND-HANSEN, B. Temporal Variations in the Ocean's Temperature. *Graficas Reunidas*, Madrid, 1930.
- SUDA, K. and SEKI, K. Report on the Mean Surface Temperatures of the Neighbouring Seas of Japan (September, October, November and December). *Journ. of Oceanogr.*, II, 644—46, *Imp. Mar. Observ.*, Kobe, Japan, 1931. (Chart legends in English.)
- THOMPSON, T. G. and WIRTH, H. E. The Specific Gravity of Sea Water at Zero Degrees in Relation to the Chlorinity. *Journal du Conseil*, VI, 232—40, 1931.

### HYDROGEN ION CONCENTRATION AND DISSOLVED GASES

- BUCH, K., WATTENBERG, H. and HARVEY, H. W. Apparent Dissociation Constants of Carbon Dioxide in Seawater of Different Salt Contents. *Nature*, CXXVIII 411—12, 1931.
- IBÁÑEZ, O. G. On the Colorimetric Determination of pH in Seawater. *Journ. Mar. Biol. Assoc. U.K.*, N.S. XVII, 483—88, 1931.
- MATSUDAIRA, Y. and TAKAHATA, T. On some experiments on the oxygen titration. *Journ. of Oceanogr.* II, 697—703, *Imp. Mar. Observ.*, Kobe, Japan, 1931. (In Japanese.)
- SEIWELL, H. R. Observations on the Phosphate-Content and Hydrogen-Ion Concentration of the North Sea, the Southern Entrance to the Norwegian Sea and the Water South of Iceland. *Journal du Conseil*, VI, 213—31, 1931.

### PHOSPHATES AND NITRATES

- SEIWELL, H. R. Observations on the Phosphate-Content and Hydrogen-Ion Concentration of the North Sea, and Southern Entrance to the Norwegian Sea and the Water South of Iceland. *Journal du Conseil*, VI, 213—31, 1931.

### OTHER CONSTITUENTS

- WATTENBERG, H. Über den Kalkgehalt des Ozeanwassers. II. Mitteilung: Die Verteilung im Atlantischen Ozean. *Ann. der Hydrogr. und Marit. Meteor.* LIX, 273—77, 1931.

### Currents.

- ON. Starke SO-liche Stromversetzung zwischen Fehmarnfeuerschiff und Gjedser-Feuer. *Hansa*, 1931, Nr. 14.
- ON. The present position of our Investigations of Ocean Currents in the Indian Ocean. *Marine Observer*, VIII, 185—86, 1931.
- ON. Drift Bottles. Ministry of Agriculture and Fisheries, Fisheries Notice, No. 16, London, 1931.
- TEMS, G. Stromgeschwindigkeiten und Wasserumsätze in den Tiefen des Ozeans. *Ann. der Hydrogr. und Marit. Meteor.* LIX, 335—39, 1931.
- ISTANI, G. Floats used in Italy for the Study of Surface currents of the Ocean. *Hydrographic Review*, VIII, No. 1, 185—89, Monaco, 1931.
- ACON, G. E. R. Velocity of Deep Currents in the South Atlantic. *Nature*, CXXVIII, 267, 1931.
- FEL, H. Krümmung der Diskontinuitätsflächen in der Atmosphäre und im Ozean. *Veröffentl. d. Preuss. Met. Inst. Berlin*, 1931, Nr. 380.
- STAFSON, T. och OTTERSTEDT, B. Svenska Strommätningar i Kattegat 1930. Svenska Hydrografisk-Biologiska Komm. Skrifter, Ny Serie: Hydrografi X. Göteborg 1931.
- IOTT, G. Der Peru-Strom und seine nördlichen Nachbargebiete in normaler und anormaler Ausbildung. *Ann. der Hydrogr. und Marit. Meteor.* LIX, 161—69, 200—13, 240—53, 1931.

### TIDES

- MIRALTY. The Admiralty Tide Tables (Standard Edition) Part I, for the year 1932. London, 1931.
- MIRALTY. The Admiralty Tide Tables (Abridged Edition) Part I, for the year 1932. London, 1931.
- BORNE, D. C. The Diurnal tide in an Ocean bounded by two meridians. *Proceed. Roy. Soc. London*, CXXXI, Series A, 38—52, 1931.
- TERSSON, O. The tidal force. *Geogr. Annaler*, H. 4, 1930.
- DEMEYER, A. Die Berechnung der Elemente der Gezeitenstromellipsen. *Ann. der Hydrogr. und Marit. Meteor.* LIX, 339—41, 1931.

### WIND

- RROWER, J. Northerly winds at Lerwick. *Meteor. Mag.* LXVI, 140—41, 1931.

### LIGHT, COLOUR AND TRANSPARENCY

- MA, A. Expériences sur la transparence des eaux marines. *Bull. de la Soc. d'Océanogr. de France*, XI, 1070—72, 1931.

### Oceanography-Miscellaneous.

- HANASSOPOULOS, G. Sur la production des eaux saumâtres spécialement des formations lagunaires et questions qui s'y rapportent. *Bull. de l'Inst. Océanogr.* No. 578, Monaco, 1931.
- ROWIK, J. The Influence of the Vistula on the Gulf of Danzig. *Grafcas Reunidas*, S.A. Madrid, 1930.
- ROWIK, J. Contributions concernant les effets des eaux de la Vistule sur les rapports dans le Golfe de Dantzig. "Kosmos", *Journ. de la Soc. Polonaise des Naturalistes "Kopernik"*, LV, Fasc. III—IV, Ser. A. Mémoires, 1930. (In Polish, French Résumé.)
- ROWIK, J. Périodicité des Fluctuations du Reflux de la Vistule. *Bull. de l'Inst. Océanogr.* No. 579, Monaco, 1931.
- SRUBIM, R. Über Verdunstungsmessung auf See. *Ann. der Hydrogr. und Marit. Meteor.* LIX, 325—35, 1931.
- RJUGIN, K. De l'Influence des détroits et de leur régime hydrologique sur la faune des mers méditerranées et leur évolution ultérieure. *Bull. de la Soc. d'Océanogr. de France*, XI, 1099—1103, 1931.
- RES, J. D. A method of mooring a floating beacon in deep water. *Hydrographic Review*, VIII, No. 1, 190, Monaco, 1931.
- IOTT, G. Der vierte Pacific Science Congress in Batavia-Bandoeng. *Ann. der Hydrogr. und Marit. Meteor.* LIX, 185—87, 1931.

## Plankton.

- BARNARD, K. H. Crustacea. Part XI. Amphipoda. British Antarctic ("Terra Nova") Exped. 1910, Zoology, VII, 307—454, British Museum, (Nat. Hist.), London, 1930.
- BERNSTEIN, T. Pelagic Protists of the Northwest Part of the Kara Sea. Trans. Arctic Inst. III, No. 1, Leningrad, 1931. (In Russian, English Résumé.)
- BURFIELD, S. T. Chaetognatha. British Antarctic ("Terra Nova") Exped. 1910, Zoology, VII, 203—228, British Museum (Nat. Hist.), London, 1930.
- DAVIDSON, V. M. Biological and oceanographic conditions in Hudson Bay. 5. The planktonic diatoms in Hudson Bay. Contrib. Canadian Biology and Fisheries, N.S. VI, 495—510, Toronto, 1931.
- FRIEDRICH, H. Mitteilungen über vergleichende Untersuchungen über den Lichtsinn einiger mariner Copepoden. Zeitschr. für vergleich. Physiol. XV, 121—38, Berlin, 1931.
- GARDINER, A. C. The Validity of Single Vertical Hauls of the International Net in the Study of the Distribution of the Plankton. Journ. Mar. Biol. Assoc. U.K., N.S. XVII, 449—72, 1931.
- KALMUS, H. Bewegungsstudien an den Larven von *Sabellaria spinulosa* Leuck. Zeitschr. für vergleich. Physiol. XV, 164—92, Berlin, 1931.
- KURASIGE, H. On a new species of Copepoda, *Calanus Syunpuensis*. Journ. of Oceanogr., II, 685—86, Imp. Mar. Observ., Kobe, Japan, 1931. (In Japanese.)
- LEBOUR, M. V. The Larvae of the Plymouth Galatheidæ. II. *Galathea squamifera* and *Galathea intermedia*. Journ. Mar. Biol. Assoc. U.K., N.S. XVII, 385—90, 1931.
- LELOUP, E. Les Porpites de "L'Armauer Hansen". Bull. du Musée Roy. d'Hist. Nat. de Belgique, VII, No. 4, Bruxelles, 1931.
- MADSEN, H. Bemerkungen über einige entozoische und freilebende marine Infusorien der Gattungen Uronema, Cyclidium, Cristigera, Aspidisca, und Entodiscus gen. nov. Zool. Anz. XCVI, 99—112, 1931.
- MARINE BIOLOGICAL ASSOCIATION. Plymouth Marine Fauna. Second Edition 1931. Being Notes of the Local Distribution of Species occurring in the Neighbourhood. Marine Biol. Assoc. of the United Kingdom, 1931.
- OSTENFELD, C. H. Concluding Remarks on the Plankton collected on the Quarterly Cruises in the Years 1902 to 1908. Cons. Perm. Int. pour l'Explor. de la Mer, Bull. Trimestriel, Quatrième Partie, 601—72, Copenhagen, 1931.
- OYE, P. VAN. La fécondation chez les Chaetognathes. Bull. du Musée Roy. d'Hist. Nat. de Belgique, VII, No. 7, Bruxelles, 1931.
- PAULSEN, O. Études sur le Microplankton de la Mer d'Alboran. Trabajos del Inst. Español de Oceanografía, Núm. 4, Madrid, 1930.
- PIRIOT, M. *Metalanecola Chevreuxi* genre et espèce nouveaux d'Amphipodes Hypérides. Bull. de l'Inst. Océanogr. No. 572, Monaco, 1931.
- RUSSELL, F. S. The Vertical Distribution of Marine Macroplankton. X. Notes on the Behaviour of Sagitta in the Plymouth Area. Journ. Mar. Biol. Assoc. U.K., N.S. XVII, 391—414, 1931.
- RUSSELL, F. S. Notes on Cyanea caught in the Ring-Trawl in the Plymouth Area during the years 1925 to 1930. Journ. Mar. Biol. Assoc. U.K., N.S. XVII, 573—76, 1931.
- SCHILLER, J. Über autochthone pflanzliche Organismen in der Tiefsee. Biologisches Zentralblatt, LI, 329—334, 1931.
- SCHREIBER, E. Über Reinkulturversuche und experimentelle Auxosporenbildung bei *Melosira nummuloides*. Archiv für Protistenkunde, LXXIII, 331—45, Jena, 1931.
- SMIRNOV, S. Zur Kenntnis der Copepodengattung *Eurytemora* Giesbr. Zool. Anz. XCIV, 194—201, 1931.
- SMIRNOV, S. *Cyclopina barentsiana* nov. sp., eine neue Copepoden Art aus dem Barents Meer. Zool. Anz. XCIV, 269—73, 1931.
- SUDA, K., MATSUDAIRA, Y., KAWASAKI, H., MIZUUTI, M. and TAKAHATA, V. T. The results of the Oceanographical Observations on board R.M.S. "Syunpu Maru" in the Setonaikai (The Inland Sea) in the years 1928, 1929 and 1930 (part 2). Journ. of Oceanogr. II, 537—43, Imp. Mar. Observ., Kobe, Japan, 1931. (In Japanese, English Résumé.)
- THIEL, M. E. Die Hydromedusen der Weddellsee. Internat. Revue der gesamt. Hydrobiol. und Hydrogr. XXV, 305—32, 1931.

- WILLEY, A. Biological and oceanographic conditions in Hudson Bay. 4. Hudson Bay copepod plankton. Contrib. Canadian Biology and Fisheries, N.S. VI, 483—93, Toronto, 1931.

## MARINE BACTERIA

- BEDFORD, R. H. The bactericidal effect of the "Prince Rupert" sea-water sampling bottle. Contrib. Canadian Biology and Fisheries, N.S. VI, 423—26, Toronto, 1931.
- YOUNG, O. C., FINN, D. B. and BEDFORD, R. H. A deep sea bacteriological water bottle. Contrib. Canadian Biology and Fisheries, N.S. VI, 417—22, Toronto, 1931.

## MARINE ALGAE

- GUÉGUEN, E. Les Constituants glucidiques des Algues Rouges. Annales de l'Inst. Océanogr. X, 35—97, 1931.

## Bottom Deposits.

- MOORE, H. B. The Muds of the Clyde Sea Area. III. Chemical and Physical Conditions; Rate and Nature of Sedimentation; and Fauna. Journ. Mar. Biol. Assoc. U.K., N.S. XVII, 325—58, 1931.
- MOORE, H. B. The Specific Identification of Faecal Pellets. Journ. Mar. Biol. Assoc. U.K., N.S. XVII, 359—66, 1931.

## Bottom Fauna.

## GENERAL

- APOLLONI, N. Ricerche faunistiche nella laguna di Orbetello. Boll. di Pesca, di Piscicoltura e di Idrobiol. VII, 396—414, Roma, 1931.
- BROTZKY, V. A. Materials for the quantitative evaluation of the bottom fauna of the Storfjord (E. Spitzbergen). Ber. des Wiss. Meeresinst. IV, Lief. 3, 47—61, Moscow, 1931. (In Russian, English Résumé.)
- COMM. INT. POUR L'EXPLOR. SCIENT. DE LA MER MÉDITERRANÉE. Faune et Flore de la Méditerranée, 14. Paris, 1931.
- IDELSON, M. S. A preliminary quantitative evaluation of the bottom fauna of the Spitzbergen bank. Ber. des Wiss. Meeresinst. IV, Lief. 3, 25—46, Moscow, 1931. (In Russian, English Résumé.)
- MARINE BIOLOGICAL ASSOCIATION. Plymouth Marine Fauna. Second Edition. Being Notes of the Local Distribution of Species occurring in the Neighbourhood. Marine Biol. Assoc. of the United Kingdom, 1931.
- NEWBIGIN, M. Life by the Sea-shore. London, 1931. (Rewritten and revised by R. ELMHIRST.)
- ZENKIEWITSCH, L. A. A quantitative evaluation of the bottom fauna in the sea region about the Kanin peninsula. Ber. des Wiss. Meeresinst. IV, Lief. 3, 5—23, Moscow, 1931. (In Russian, English Résumé.)

## SPECIAL GROUPS

- ANNENKOVA, N. Die Polychaeten in den Sammlungen der Jakutischen Expedition der Akademie der Wissenschaften der U.S.S.R. Zool. Anz. XCV, 203—05, 1931.
- BARNARD, K. H. Crustacea. Part XI. Amphipoda. British Antarctic ("Terra Nova") Exped. 1910. Zoology, VII, 307—454, British Museum, (Nat. Hist.), London, 1930.
- BERRILL, N. J. Studies in Tunicate Development. Part II. — Abbreviation of Development in the Molgulidae. Philosophical Trans. Roy. Soc., Ser. B, No. 468 B, 1931.
- BILLARD, A. Hydroides récoltés dans les campagnes du "Pourquoi-Pas?" en 1920, 1921, 1924, 1927, 1929 et 1930. Bull. du Muséum Nation. d'Hist. Nat., Sér. 2, III, 244—50, 1931.
- DEICHMANN, E. The Holothurians of the Western part of the Atlantic Ocean. Bull. Museum Comp. Zool. Harvard College, LXXI, 43—226, Cambridge, Mass., U.S.A. 1930.
- FRASER, C. M. Biological and oceanographic conditions in Hudson Bay. 3. Hydroids of Hudson Bay and Hudson Strait. Contrib. Canadian Biology and Fisheries, N.S. VI, 475—81, Toronto, 1931.
- GRAHAM, A. On the Morphology, Feeding Mechanisms and Digestion of *Ensis siliqua* (Schumacher). Trans. Roy. Soc. Edinburgh, LVI, 725—51, 1931.

- HARANT, H. Contribution à l'Histoire naturelle des Ascidies et de leur parasites. Annales de l'Inst. Océanogr. VIII, 231—389, 1931.
- KLEIN, K. Eine Beobachtung an Sepia. Biologisches Zentralblatt, LI, 381—82, 1931.
- LACROIX, E. Microtexture du test des Textularidae. Bull. de l'Inst. Océanogr. No. 282, Monaco, 1931.
- LELOUF, E. Contribution à la Répartition des Ceriantaires dans le Sud de la Mer du Nord. Bull. du Musée Roy. d'Hist. Nat. de Belgique, VII, No. 2, Bruxelles, 1931.
- LOSINA-LOSINSKY, L. K. Pantopoda, gesammelt von den Expeditionen des Wissenschaftlichen Meeresinstituts in den Jahren 1921, 1923. Ber. des Wiss. Meeresinst. IV, Lief. 3, 63—87, Moscow, 1931. (In Russian, German Résumé.)
- LÜDERS, K. und TRUSHEIM, F. Beiträge zur Ablagerung mariner Mollusken in der Flachsee. II. TRUSHEIM, F. Versuche über Transport und Ablagerung von Mollusken. Senckenbergiana, XIII, 124—39, Frankfurt a. M., 1931.
- MACGINITIE, G. E. The Egg-laying Process of the Gastropod, *Alectron fossatus*, Gould. Ann. and Mag. of Nat. Hist., Ser. 10, VIII, 258—61, 1931.
- MALDURA, C. Relazione sulla crociera compiuta in Cirenaica per le indagini sulla pesca delle spugne. Boll. di Pesca, di Piscicoltura e di Idrobiol. VII, 415—44, Roma, 1931.
- NICOL, E. A. T. The feeding mechanism, formation of the tube, and physiology of digestion in *Sabella pavonina*. Trans. Roy. Soc. Edinburgh, LVI, 537—98, 1931.
- ORTON, J. H. and MOORE, H. B. Occurrence of *Protodrilus flavocapitatus* at Port Erin. Nature, CXXVII, 780—81, 1931.
- POISSON, R. et MAURY, A. *Arcturina bangulensis* nov. gen., nov. sp., Crustacé Isopode nouveau (tribu des Valvifera, famille des Arcturidae), capturé à Banyuls (Pyr. Orientales). Bull. de l'Inst. Océanogr. No. 573, Monaco, 1931.
- SCHULZ, E. Beiträge zur Kenntnis mariner Suctorien. Zool. Anz. XCVI, 95—99, 1931.
- TRISSIER, G. Étude expérimentale du développement de quelques Hydroides. Ann. des Sciences Naturelles, Zoologie, Sér. X, Tome XIV, 5—60, Paris, 1931.
- THOMSON, J. A. and RENNET, N. Alcyonaria, Madreporaria and Antipatharia. Australasian Antarctic Expedition, 1911—14. Scient. Reports, Series C: Zoology and Botany, Vol. 9, Part 3, Sydney, New South Wales, 1931.
- YONGE, C. M. The Significance of the Relationship between Corals and Zooan Nature, CXXVIII, 309—11, 1931.

## Fishery Investigations.

### GENERAL

- ANGELIS, R. DE. I nostri paesaggi e i nostri centri pescherecci. Il Golfo di Salerno. Boll. di Pesca, di Piscicoltura e di Idrobiol. VII, 507—16, Roma, 1931.
- ANON. Recommendations et Programmes (Mars 1931). Cons. Perm. Int. pour l'Explor. de la Mer, Rapp. et Proc. Verb., LXXIV, 31—101, Copenhague, 1931.
- BOROWIK, J. Revue des Travaux de l'Institut National Polonais d'Économie Rurale accomplies dans le domaine de la Pisciculture au cours de la période annuelle 1929—30. Bydgoszcz, 1930. (In Polish, French Résumé.)
- FISCHER, E. Die Fischerei-Forschungsinstitute in Deutschland. a) Für Seefischerei. Jahresber. über die Deutsche Fischerei, 1930, 244—52, Berlin, 1931.
- FISCHER, E. Die wichtigste Fischereiliteratur des Jahres 1930. A. Seefischerei. Jahresber. über die Deutsche Fischerei 1930, 258—66, Berlin, 1931.
- HACHEY, H. B. and WALKER, S. J. Biological and oceanographic conditions in Hudson Bay. 2. Report on the Hudson Bay Fisheries Expedition of 1930. A. Open water investigations with the S. S. Loubryne. B. Investigations at Churchill, Manitoba. Contrib. Canadian Biology and Fisheries, N.S. VI, 463—74, Toronto, 1931.
- HUNTSMAN, A. G. Biological and oceanographic conditions in Hudson Bay. 1. Hudson Bay and the determination of fisheries. Contrib. Canadian Biology and Fisheries, N.S. VI, 455—62, 1931.
- POLICE, G. La pesca nei mari di Calabria. Le condazioni dei mari di Calabria rispetto alla pesca. Boll. di Pesca, di Piscicoltura e di Idrobiol. VII, 517—59, 1931.
- QUIBBON. Science and the Fishing Industry. Fish Trades Gazette, 27, 25-VII-31.

## COMMERCIAL FISHERIES

- ALTAZIN, E. La Marée. Sa Conservation — Sa Consommation. Annales de l'Inst. Océanogr. VIII, 393—416, 1931.
- BOROWIK, J. Dix Années de Pêche Maritime en Pologne (1920—1930). Tables Statistiques. Bydgoszcz, 1930.
- BOROWIK, J. Contributions to the Study of Methods of Fish Protection. Archives d'Hydrobiol. et d'Ichthyologie, V, 315—32, 1930. (In Polish.)
- EICHELBAUM, E. Die Seefischerei. Jahresber. über die Deutsche Fischerei, 1930, 11—110, Berlin, 1931.
- ENGLAND. Report on Sea Fisheries for the year 1930. Ministry of Agriculture and Fisheries, London, 1931.
- FENAROLI, L. Notizie sulla pesca nel Mossamedes (Angola) e sui prodotti derivati, olio di pesce e guano. Elenco delle specie di interesse economico e omologazione dei nomi locali portoghesi. Boll. di Pesca, di Piscicoltura e di Idrobiol. VII, 448—56, Roma, 1931.
- FISCHER, E. Die Kutter-Hochseefischerei und Küstenfischerei in Nord- und Ostsee. Jahresber. über die Deutsche Fischerei, 1930, 176—94, Berlin, 1931.
- LOFTAS, W. Brätfischhandel in Grossbritannien. Handb. der Seefischerei Nord-europas (Lübbert u. Ehrenbaum), IX, Heft 3 a, Stuttgart, 1931.
- LÜBBERT, H. Umfang und Methoden der französischen Seefischerei. Der Fischerbote, XXIII, 189—98, 1931.
- MORTENSEN, F. V. Sea Fisheries of Denmark: One of the Nation's Most Important Industries. Fishing News, 28—29, 1-VIII-31.
- NEUMANN, J. Die deutsche Hochseefischerei. Jahresber. über die Deutsche Fischerei 1930, 161—70, Berlin, 1931.
- NOTEVARP, O. Statens Fiskeriforsøksstasjons virksomhet. Årsberet. vedkom. Norges Fiskerier 1930, Nr. 3, Bergen, 1931.
- POLAND. Pêches Maritimes Polonaises. IV. (1928—1930). Bydgoszcz, 1931.
- REAY, G. A. Cold Storage of Fish. Fish Trades Gazette, 24—25, 12-IX-31.
- ROSÉN, N. Sveriges in- och utförel av fiskeriprodukter 1930. Ny Svensk Fiskeritidskrift, Nr. 17, 161—70, 1931.
- SCHNAKENBECK, W. Die bisherigen Erfahrungen mit der Verwendung von Flugzeugen im Dienste der Seefischerei. Der Fischerbote, XXIII, 275—78, 1931.
- SCOTLAND. Forty-ninth Annual Report of the Fishery Board for Scotland, being for the year 1930. Edinburgh, 1931.
- SELIGO, A. Die Seefischerei von Danzig. Handb. der Seefischerei Nordeuropas (Lübbert u. Ehrenbaum), VIII, Heft 7, Stuttgart, 1931.
- STEINERT, H. Die neuere Entwicklung der niederländischen Seefischerei. Der Fischerbote, XXIII, 220—27, 1931.
- SUND, O. Die Lofotfischerei. Der Fischerbote, XXIII, 249—58, 1931.

## FISHING GEAR

- ANON. Developing the Perfect Trawl Net. Fish Trades Gazette, 33—34, 25-VII-31.
- ANON. The History of Trawling. Part One: "The Origin of Trawling". Fish Trades Gazette, 33—34, 29-VIII-31.
- ATKINS, W. R. G. The Deterioration of Fabrics Exposed on a Roof after Treatment with Fishing-net Preservatives. Journ. Mar. Biol. Assoc. U.K., N.S. XVII, 473—78, 1931.
- BOROWIK, J. Études concernant l'Influence des engins sur la composition de la pêche. Bydgoszcz, 1931. (In Polish.)
- MEYER, P. F. Die im Jadebusen gebräuchlichen Granatfangergeräte und ihre Eignung für den Fang. Mitt. des Deutsch. Seefisch. Ver. XXXXVII, 264—74, 1931.
- ROSÉN, N. En ny trål. Ny Svensk Fiskeritidskrift, Nr. 18, 172—73, 1931.

## Fishes.

## GENERAL

- ARCIDIACONO, F. La pesca del pesce vacca (*Hexanchus griseus* L.) nella marine di Riposto. Boll. di Pesca, di Piscicoltura e di Idrobiol. VII, 608—12, Roma, 1931.
- BIGELOW, H. B. and SCHROEDER, W. C. A rare Bramid Fish (*Taractes princeps* John-



- son) in the Northwestern Atlantic. Bull. Museum Com. Zool. Harvard College, LXXIX, 41—50, Cambridge, Mass., U.S.A. 1929.
- BINAOGHI, G. Osservazioni sul rapporto ponderale tra soma e fegato nei Teleostei. R. Com. Talasso. Ital., Mem. CLXXXIV, Venezia, 1931.
- BORODIN, N. A. Atlantic Deep-Sea Fishes. Bull. Museum Comp. Zool., Harvard College, LXXII, 55—89, Cambridge, Mass., U.S.A. 1931.
- DE BUEN, F. *Lebetus* Whinter 1877, *Odondebuena* nov. gen. y *Cabotia* nov. gen. (Gobiidae de Europa). Trabajos del Inst. Español de Oceanografía, Núm. 5, Madrid, 1930.
- CHABANAUD, P. A propos de la nomenclature des poissons de l'ordre des *Heterosomata* Cope. Bull. du Muséum Nation. d'Hist. Nat. Ser. 2, III, 302—03, 1931.
- COMM. INT. POUR L'EXPLOR. SCIENT. DE LA MER MÉDITERRANÉE. Faune et Flore de la Méditerranée, 14. Paris, 1931.
- DENKER. Über das Hörvermögen der Fische. Acta Oto-Laryngol. XV, 247—60, 1931.
- GILTAY, L. Poissons recueillis au Groenland Oriental en 1927 at en 1928, par. M. Dumbrava. Bull. du Musée Roy. d'Hist. Nat. de Belgique, VI, No. 22, Bruxelles, 1930.
- GILTAY, L. Note sur quelques poissons de la Sibirie Oriental. Bull. du Musée Roy. d'Hist. Nat. de Belgique, VI, No. 23, Bruxelles, 1931.
- GRUNDFEST, H. The relative effectiveness of spectral radiation for the vision of the Sunfish *Lepomis*. Proc. Nat. Acad. Sci. Philad. XVII, 1931.
- MATHESON, C. A Rare British Fish: Relative of the Sea Serpent in the Trawl. Fishing News, 30, 13-VI-31.
- METZNER, H. und RÖHLER, E. Neue Untersuchungen über die Zusammensetzung der Körpersubstanz einiger Seefische. Der Fischerbote, XXIII, 235—45, 1931.
- MILES, W. R. Behavior of Fish in Elevated Water Bridges connecting Adjoining Aquaria. J. Comp. Psychol. XII, 123—32, 1931.
- NORMAN, J. R. A History of Fishes. London, 1931.
- ROULE, L. Le phénomène de l'anorexie génétique chez les poissons. C. R. Soc. Biol. CV, 675—6, 1930.
- ROULE, L. et ANGEL, F. Observations et rectifications concernant divers Poissons recueillis par S.A.S. le Prince Albert Ier de Monaco au cours des Campagnes 1911 à 1914. Bull. de l'Inst. Océanogr. No. 281, Monaco, 1931.
- SCHNAKENBECK, W. Zum Rassenproblem bei den Fischen. Zeitschr. f. Morphologie und Ökologie der Tiere, XXI, 409—566, 1931.
- STEVEN, G. A. Rays and Skates of Devon and Cornwall. Methods of Rapid Identification on the Fish Market. Journ. Mar. Biol. Assoc. U.K., N.S. XVII, 367—78, 1931.
- VERRIER, M. La vision chez les poissons. Bull. Assoc. français Avancement des Sciences, LX, 165—77, 1931.
- VERRIER, M. Sur les organes sensoriels des poissons de grande profondeur. C. R. Acad. Sci. Paris, CXCII, 297—9, 1931.
- WARNER, L. H. The Problem of Color Vision in Fishes. Quart. Rev. Biology, VI, 329—48, 1931.
- YONGE, C. M. Digestive Processes in Marine Invertebrates and Fishes. Journal du Conseil, VI, 175—212, 1931.

## EGGS AND LARVAE

- DESBROSSES, P. Note sur l'oeuf de la Raie Chardon *Raja fullonica* L. Bull. de la Soc. Zool. de France, LVI, 15—18, Paris, 1931.
- DE GAETANI, D. Uova, sviluppo embrionale e stadi post-embriionali negli *Sparidi*. I. *Oblata Melanura* Cuv. R. Com. Talasso. Ital., Mem. CLXXXIII, Venezia, 1931.
- INABA, D. On some Teleostean Eggs and Larvae found in Mutzu Bay. Records of Oceanographic Works in Japan, III, 53—62, Tokyo, 1931.
- ROULE, L. Les poissons et le monde vivant des eaux: études ichthyologiques et philosophiques. (Les oeufs et les nids, Tome 4). Paris, 1931.
- SANZO, L. Uova, stadi embriionali e post-embriionali di *Naucrates duetor* L. R. Com. Talasso. Ital., Mem. CLXXXV, Venezia, 1931.
- SPARTA, A. Contributo alla conoscenza di uova e larve nei Labridi. II. Uova e larve di *Crenilabrus ocellatus* Forsk. R. Com. Talasso. Ital., Mem. CLXXXII, Venezia, 1931.

- TÄNING, Å. V. Postlarval Stages of *Bathylagus* from the North Atlantic. Vidensk. Medd. fra Dansk. Naturh. Foren. Bd. 92, 269—74, 1931.

## FISH HATCHING

- LECHLER, H. Zur Frage der Seeforellen- und Hechterbrutung. Allgemeine Fischerei-Zeitung, LVI, 8—10, 1931.

## FISH PARASITES AND DISEASES

- DESBROSSES, P. Traumatismes de la bouche chez la Dorade commune. Les problèmes qu'ils posent, concernant la biologie de cette espèce. Rev. des Trav. de l'Office des Pêches Marit. IV, 183—96, 1931.
- GUIART, J. Considérations historiques sur la nomenclature et sur la classification des Tétrarhynques. Bull. de l'Inst. Océanogr. No. 575, Monaco, 1931.
- LELOUP, E. Deux Cas d'Épibiose de l'Hydropolype, *Campanularia johnstoni* Alder. Bull. du Musée Roy. d'Hist. Nat. de Belgique, VI, No. 19, Bruxelles, 1930.
- MACKINNON, D. L. and RAY, H. N. Notes on the Ciliate *Boveria stevensi* Issel from *Galeomma turtoni* Sowerby at Plymouth. Journ. Mar. Biol. Assoc. U.K., N.S. XVII, 577—82, 1931.
- MANTER, H. W. Some Digenetic Trematodes of Marine Fishes of Beaufort, North Carolina. Parasitology, XXIII, 396—411, 1931.
- PATZELT, H. Dos Trematodos parasitos de *Sardinella aurita* Cuv. y Val., *Aphanurus stossichi* Mont. y *Hemirurus appendiculatus* Rud. Notas y Resúmenes, Ser. II, Núm. 45, 1930.
- PETRUSCHEWSKY, G. K. Über die Verbreitung der Plerocercocoe von *Diphyllobothrium latum* in den Fischen der Newabucht. Zool. Anz. XCIV, 139—47, 1931.
- PIGULEWSKY, S. W. Neue Arten von Trematoden aus Fischen des Dnjeprbassins. Zool. Anz. XCVI, 9—18, 1931.
- REICHENOW, E. Parasitische Flagellata. Die Tierwelt der Nord- und Ostsee (Grimpe u. Wagler), Teil II. e<sub>1</sub>, Leipzig, 1931.
- ZUELZER, M. Spirochaeta. Die Tierwelt der Nord- und Ostsee (Grimpe u. Wagler), Teil II. f, Leipzig, 1931.

## AQUARIUM EQUIPMENT

- ATKINS, W. R. G. Note on the Condition of the Water in a Marine Aquarium. Journ. Mar. Biol. Assoc. U.K., N.S. XVII, 479—82, 1931.

## AGE-DETERMINATION

- MONASTYRSKY, G. N. Über Methoden zur Bestimmung des linearen Wachstums des Fische nach der Schuppe. Reports Scient. Inst. of Fisheries, V, No. 4, 3—44, Moscow, 1930. (In Russian, German Résumé.)

## PLAICE AND OTHER PLEURONECTIDS

- ANON. Gesetz über das zwischen Deutschland, Dänemark, Danzig, Polen und Schweden geschlossene Übereinkommen über die Regelung der Schollen- und Flunderfischerei in der Ostsee vom 9. August 1930, nebst den Verordnungen vom 24. Februar 1931 und 16. März 1931 und der Bekanntmachung vom 21. März 1931. Jahresber. über die Deutsche Fischerei 1930, 276—80, Berlin, 1931.
- BOROWIK, J. Pêches des pleuronectes à la côte polonaise. Pêches Maritimes Polonaises, IV, 169—225, Bydgoszcz, 1931. (In Polish, French Résumé.)
- DIXON, B. Quelques observations sur la rapidité de croissance de Pleuronectes dans le golfe de Dantzig. Mém. de l'Inst. Nat. Polonais d'Economie Rur. à Pulawy, Nr. 160, Pulawy, 1930.
- JENKINS, J. T. The Plaice Fisheries: Alarming Trend of Post-War Years. Fish Trades Gazette, 30, 30-V-31.
- JENSEN, A. J. C. Investigations of the Plaice Stock in the Southern Horns Reef Area in the years 1928—1930. Meddel. fra Komm. for Danmarks Fiskeri- og Havundersøgelser, Serie: Fiskeri. Bind IX, Nr. 2, København, 1931.
- KÄNDLER, R. Erneuerung und Nutzung des Schollen- und Flunderbestandes im Gebiet der Oderbank. Ber. der Deutsch. Wiss. Komm. für Meeresforschung, N.F. VI, 22—61, Leipzig, 1931.

SSYTSCH, N. W. Ueber *Pleuronectes flesus* des Barenz und des Weissen Meeres. Reports Scient. Inst. of Fisheries, V, No. 4, 87—116, Moscow, 1930. (In Russian.)

## COD

BEAUGÉ, L. Les différentes races de morues. Rev. des Trav. de l'Office des Pêches Marit. IV, 197—201, 1931.

JEFFERS, G. W. Observations on the Cod Fishery in the Strait of Belle Isle. Bull. XVIII of the Biol. Board of Canada, Toronto, 1931.

KUSMIN-KARAWAJEW, G. A. Beiträge zur Biologie von *Eleginus navaga* P. des Weissen Meeres. Reports Scient. Inst. of Fisheries, V, No. 4, 55—79, Moscow, 1930. (In Russian.)

KUSMIN-KARAWAJEW, G. A. Jungfische von *Eleginus navaga* P. der Ostküste von Murman. Reports Scient. Inst. of Fisheries, V, No. 4, 81—86, Moscow, 1930. (In Russian.)

SCHMIDT, JOHS. Les nouvelles recherches sur les migrations de la morue dans le nord de l'Atlantique. La Pêche Maritime, la Pêche Fluviale et la Pisciculture, XIV, 1009—10, 11-X-31.

SUND, O. Die Lofotfischerei. Der Fischerbote, XXIII, 249—58, 1931.

## HAKE

ANON. Les recherches sur la biologie du merlu par le "marquage". La Pêche Maritime la Pêche Fluviale et la Pisciculture, XIV, 989, 4-X-31.

## HERRING

ANON. Die schwedische Heringsfischerei und der Trawheringsfang. Der Fischerbote XXIII, 160—61, 1931.

BORODATOWA, S. A. Die Heringe des Barenz-Meeres. Reports Scient. Inst. of Fisheries, V, No. 4, 45—54, Moscow, 1931. (In Russian.)

GRAHAM, M. Some Problems in Herring Behaviour. Journal du Conseil, VI, 252—65, 1931.

HODGSON, W. C. East Anglian Herring Fishery: This Year's Prospects examined. Fishing News, 28—29, 22-VIII-31.

LISSNER, H. Die Fangplätze der Deutschen grossen Heringsfischerei. Der Fischerbote, XXIII, 157—60, 1931.

LISSNER, H. Haunts of the Herring: Where the German Fleet is told to operate. Fishing News, 29, 4-VII-31.

LISSNER, H. Die Deutsche Heringsfischerei mit Treibnetzen im Jahre 1930. Ber. der Deutsch. Wiss. Komm. für Meeresforschung, N. F. VI, 1—21, Leipzig, 1931.

MUZINIC, S. Der Rhythmus der Nahrungsaufnahme beim Hering. Ber. der Deutsch. Wiss. Komm. für Meeresforschung, N. F. VI, 62—64, 1931.

ROUNSEFELL, G. A. Fluctuations in the supply of Herring (*Clupea pallasii*) in South-eastern Alaska. Bull. Bureau of Fisheries, XLVII, 15—56, U.S.A. 1931.

RUDOLPH, H. Wieder ein Heringszwitter. Zool. Anz. XCV, 37—41, 1931.

STEFFEN, W. Die grosse Heringsfischerei. Jahresber. über die Deutsche Fischerei 1930, 171—75, Berlin, 1931.

SCHNAKENBECK, W. Zum Rassenproblem bei den Fischen. Zeitschr. f. Morphologie und Ökologie der Tiere, XXI, 409—566, 1931.

STEWART, J. I. The Scottish Herring Fishing Industry and the Factors which affect the Market for Cured Herrings. Scottish Geogr. Mag. XLVII, 219—227, 1931.

TCHOUGOUNOFF, N. L. On the contemporary herring fisheries in North Sea. Reports 3rd Caspian Herring Exped. Vol. 1, 1930.

## PILCHARD, SPRAT AND ANCHOVY

ANON. Die Sardinenfischerei in Frankreich. Der Fischerbote, XXIII, 230—32, 1931.

ARNÉ, P. Contribution à l'étude de l'Anchois du Golfe de Gascogne (*Engraulis encrassicholus* L.). Rev. des Trav. de l'Office des Pêches Maritimes, IV, 153—82, 1931.

CLARK, F. N. Dominant size-groups and their influence in the fishery for the California Sardine (*Sardina caerulea*). Division of Fish and Game of California, Fish. Bull. No. 31, 7—44, Sacramento, 1931.

RAMALHO, A. et BOTO, R. Sur la Relation entre la Croissance de la Sardine et celle des écailles. Trav. de la Stat. de Biol. Marit. de Lisbonne, No. 26, 1931.

#### MACKEREL

JENSEN, A. J. C. Udsigterne for Makrellfiskeriets Udbytte i Sundet i Efteraaret 1931. Dansk Fiskeritidende, Nr. 35, 445—46, 1931.

SETTE, O. E. Outlook for the Mackerel Fishery in 1931. U. S. Dept. of Commerce, Bureau of Fisheries, Fishery Circular No. 4, 1931.

#### EELS

HORNLYOLD, A. G. Le sexe, la croissance et la formation des zones des écailles de la petite Anguille jaune des étangs de Thau, d'Ingril, de Vic, et de Vaccares. Bull. de la Soc. Centr. d'Aquiculture et de Pêche, XXXVIII, 35—43, 1931.

JENSEN, A. J. C. Om Udsigterne for Blankaalsfiskeriet i Efteraaret 1931. Dansk Fiskeritidende, Nr. 34, 428—29, 26-VIII-31.

SCHMIDT, JOHS. Eels and Conger Eels of the North Atlantic. Nature, CXXVIII, 602—04, 1931.

SKLOWER, A. Die Bedeutung der Schilddrüse für die Metamorphose des Aales und der Plattfische. Forschungen und Fortschritte, November 1930.

#### Freshwater Fish.

ANON. Wanderungen von Ostseelachsen. Der Fischerbote, XXIII, 278—81, 1931.

BHATIA, D. A critical study of the scales of two specimens of starved and excessively fed Trout — *Salmo irideus*. Journal du Conseil, VI, 266—72, 1931.

DIXON, B. Sea Trout of Reda River. Mém. de l'Inst. Nat. Polonais d'Économie Rur. à Pulawy, XI, 218—263, Pulawy, 1930.

HENKING, H. Untersuchungen an Salmoniden. Teil II. Cons. Perm. Int. pour l'Explor. de la Mer, Rapp. et Proc.-Verb., LXXIII, Copenhague, 1931.

LIMA, J. A. P. DE. Truite à colonne vertébrale raccourcie. Bull. de la Soc. Portugaise des Sciences Nat., Tome XI, 47—48, 1930.

OTTERSTRÖM, C. V. Die Turbinen und die abwärts wandernden jungen Lachse und Forellen. Journal du Conseil, VI, 273—86, 1931.

SKLOWER, A. Die Pertelticker Forellenversuche und ihre praktische Bedeutung. Allgemeine Fischerzeitung, Nr. 4 und 5, 1931.

WILLER, A. und QUEDNAU, W. Untersuchungen über den Lachs (*Salmo salar* L.) I. Zeitschr. für Fischerei und deren Hilfswissenschaften, XXIX, 185—215, 1931.

#### POLLUTION

IVLEV, V. S. Zum Studium der Biologie des Flussbrandes des Flusses Ob. Zool. Anz. XCVI, 23—30, 1931.

SCOTLAND. Second Report of the Scottish Advisory Committee on Rivers Pollution Prevention. River Esk (Midlothian). Dept. of Health for Scotland, Edinburgh, 1931.

#### Oysters and other Lamellibranchs.

BORDE, F. Le captage du naissain dans le bassin d'Arcachon. La Pêche Maritime, la Pêche Fluviale et la Pisciculture, XIV, 617—19, 1931.

HOPKINS, A. E. Temperature and the Shell Movements of Oysters. Bull. Bureau of Fisheries, XLVII, 1—14, U.S.A. 1931.

HOPKINS, A. E. Factors influencing the spawning and setting of Oysters in Galveston Bay, Tex. Bull. Bureau of Fisheries, XLVII, 57—83, 1931.

McMILLIN, H. C. and BONNOT, P. Oyster Culture in California. California Fish and Game, XVII, 246—51, San Francisco, 1931.

ORTON, J. H. On the Effect of the Severe Winter of 1928—1929 on the Oyster Drills with a Record of Five Years Observations on Sea-Temperature on the Oyster-beds of the Blackwater Estuary. Journ. Mar. Biol. Assoc. U.K., N.S. XVII, 301—14, 1931.

ORTON, J. H. and AMIRTHALINGAM, C. Observations and Experiments on Sex-Change in the European Oyster (*O. edulis*). Part II. On the Gonad of Egg-Spawning Individuals. Journ. Mar. Biol. Assoc. U.K., N.S. XVII, 315—24, 1931.

- STEPHEN, A. C. Notes on the Biology of Certain Lamellibranchs on the Scottish Coast. Journ. Mar. Biol. Assoc. U.K., N.S. XVII, 277—300, 1931.
- VOISIN, P. La maladie des huîtres de Zélande. Rev. des Trav. de l'Office des Pêches Marit. IV, 221—22, 1931.
- VOISIN, P. Quelques observations sur l'absence de "verdeur" dans la région de Marennes. Rev. des Trav. de l'Office des Pêches Marit. IV, 223—30, 1931.

#### Crustacea.

- EHRENBAUM, E. Die Wollhandkrabbe auf der 37. Wanderausstellung der D.L.G. Der Fischerbote, XXIII, 163—64, 1931.
- HELDT, H. et HELDT, H. (Mme). Les Langoustines (*Nephrops norvegicus* Leach) dans les Mers Tunisiennes. Stat. Océanogr. de Salammbô, Notes No. 16, 1931.

#### Whales and Seals.

- GRAY, R. W. The Colour of the Greenland Sea and the Migrations of the Greenland Whale and Narwhal. Geogr. Journ. LXXVIII, 284—90, 1931.

#### Biological-Miscellaneous.

- RENOUF, L. Preliminary Work of a new Biological Station (Lough Ine, Co. Cork, I.F.S.). Journ. Ecol. XIX, 410—38, 1931.
- SCHLIEFER, C. Über das Eindringen mariner Tiere in das Süßwasser. Biologisches Zentralblatt, LI, 401—12, 1931.
- YONGE, C. M. Digestive Processes in Marine Invertebrates and Fishes. Journal du Conseil, VI, 175—212, 1931.
